# Supplementary material for: A diketopyrrolopyrrole-based fluorescent porous organic polymer as fluoride sensing monolithic device
Source: Royal Society of Chemistry journal article supplement (doi:10.1039/c8tc00183a), 2018-01-01
Supplement: c8tc00183a2.pdf [file c8tc00183a2.pdf]

## Electronic Supplementary Information

### A Diketopyrrolopyrrole-Based Fluorescent Porous Organic Polymer as Fluoride Sensing Device

Shiming Bi,<sup>‡a</sup> Yankai Li,<sup>‡b</sup> Shaoze Zhang<sup>b</sup>, Limin Wang,<sup>\*a</sup> Jun Hu,<sup>\*b</sup> and Honglai Liu<sup>b</sup>

<sup>a</sup> Key Laboratory for Advanced materials and Department of Chemistry, East China University of Science and Technology, Shanghai, 200237, China.

E-mail: [wanglimin@ecust.edu.cn](mailto:wanglimin@ecust.edu.cn)

<sup>b</sup> State Key Laboratory of Chemical Engineering and Department of Chemistry, East China University of Science and Technology, Shanghai, 200237, China.

E-mail: [junhu@ecust.edu.cn](mailto:junhu@ecust.edu.cn)

<sup>‡</sup> These authors contributed equally to this work and should be considered co-first authors.

#### Materials and Methods

Commercial chemicals and dry solvents were used as received. 3,6-bis(4-bromophenyl)pyrrolo[3,4-c]pyrrole-1,4(2H,5H)-dione<sup>1</sup>, tetrakis(4-ethynylphenyl)methane<sup>2</sup> were synthesized according to literature procedures.

#### Synthesis of Uni-DPP

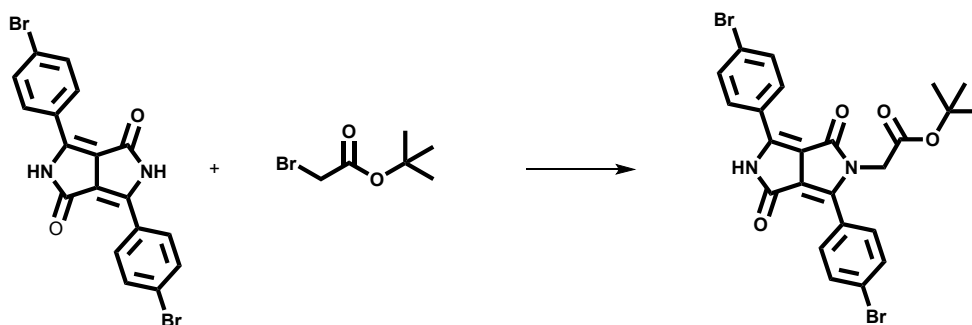

To a stirred suspension of 3,6-bis(4-bromophenyl)pyrrolo-[3,4-c]pyrrole-1,4(2H,5H)-dione (1.14 g, 2.6 mmol) in DMF (30 mL) at room temperature, potassium tert-butoxide (0.81 g, 7.1 mmol) was added under N<sub>2</sub>. The mixture turned into purple and was stirred for 30 min. tert-butyl 2-bromoacetate (0.76 g, 3.9 mmol) was gradually added and the resultant reddish mixture was stirred for 6 h at room temperature. The mixture was poured into 400 mL of water and stirred for 1 h. The crude product was obtained by filtration and then further purified by flash column chromatography using DCM/ethyl acetate = 5/1 as the eluent. Yield: 0.65 g (51%). <sup>1</sup>H NMR (400 MHz, DMSO): 11.46 (s, 1H), 8.37-8.39 (d, 2H), 7.80-7.84 (m, 4H), 7.73-7.50 (d, 2H), 4.53 (s, 2H), 1.29 (s, 9H); <sup>13</sup>C NMR (100 MHz, DMSO): δ = 167.4, 162.3, 161.0, 145.7, 144.3, 132.3, 132.0, 130.3, 129.7, 126.6, 126.4, 126.2, 124.8, 111.4, 108.1, 82.0, 43.8, 27.4;

### Synthesis of Uni-DPP-PPN

The Uni-DPP-PPN was synthesized via Sonogashira coupling reaction using tetrakis(4-ethynylphenyl)methane (1 equiv, 50 mg, 0.12 mmol) and tert-butyl 2-(3,6-bis(4-bromophenyl)-1,4-dioxo-4,5-dihydropyrrolo[3,4-c]pyrrol-2(1H)-yl)acetate (Uni-DPP; 2 equiv, 134.5 mg, 0.24 mmol) in toluene/triethylamine (1:1, v/v) at 80 °C using palladium(0)tetrakis(triphenylphosphine) (0.14 mol %) and copper(I) iodide (0.26 mol %) as catalysis for 3 d. After cooling to room temperature, the precipitated polymers were isolated by filtration over a Buchner funnel and washed with 1 M hydrochloric acid (20 mL), followed with excess methanol, tetrahydrofuran, and dichloromethane. Then, the product was further extracted with dichloromethane by Soxhlet apparatus for 24 h. The solvent was removed under vacuum at room temperature to afford the DPP-PPN-m. Anal. Calcd. for Uni-DPP-PPN: C, 79.84; H, 4.94; N, 4.60. Found: C, 75.07; H, 4.30; N, 4.01;

### COMPUTATIONAL METHODOLOGY

In this study, all the calculations were performed by utilizing the Gaussian 09 suite of programs<sup>1</sup>. The geometries of the isolated molecule and coordination complex were fully optimized at the method level of B3LYP/6-311G\*<sup>2-3</sup>. No symmetry or geometry constraint was imposed during the optimizations. Frequency calculations were implemented at the same theoretical levels to corroborate that all the structures are genuine minima on the potential energy surface.

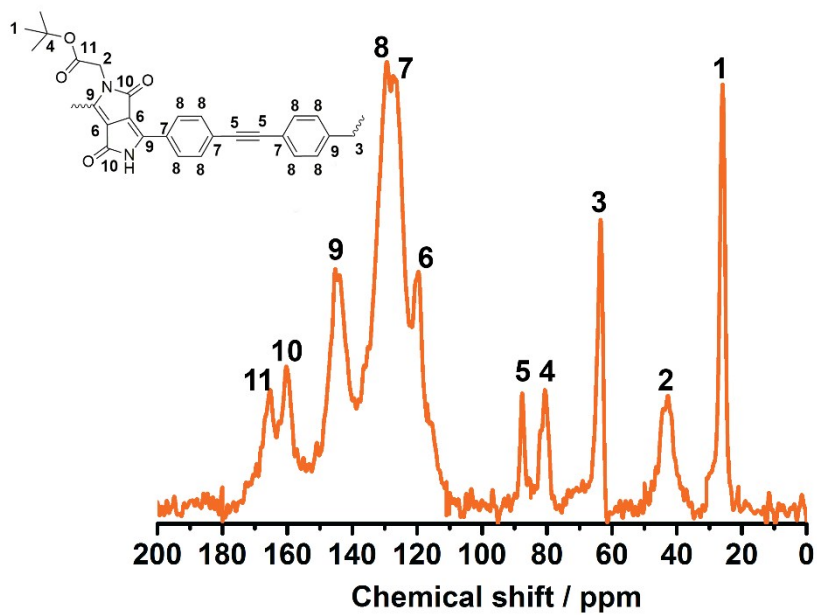

Fig. S1 Solid state  $^{13}\text{C}$  NMR spectrum of Uni-DPP-PPN

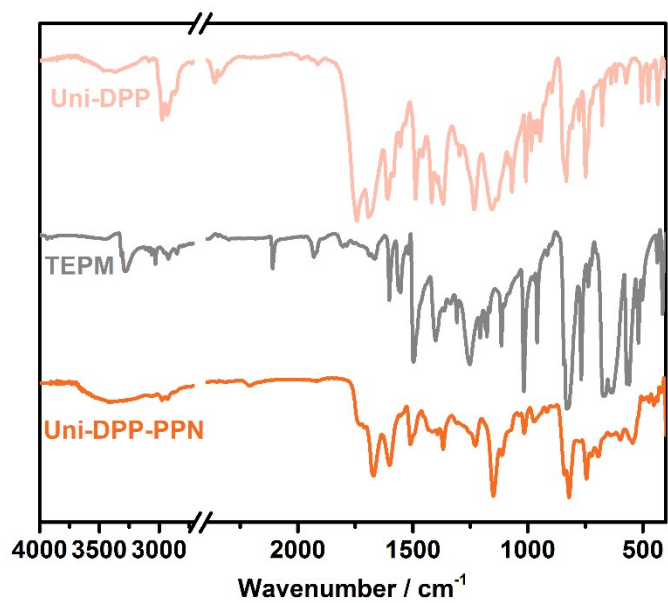

Fig. S2 FTIR spectra of Uni-DPP, TEPE and Uni-DPP-PPN

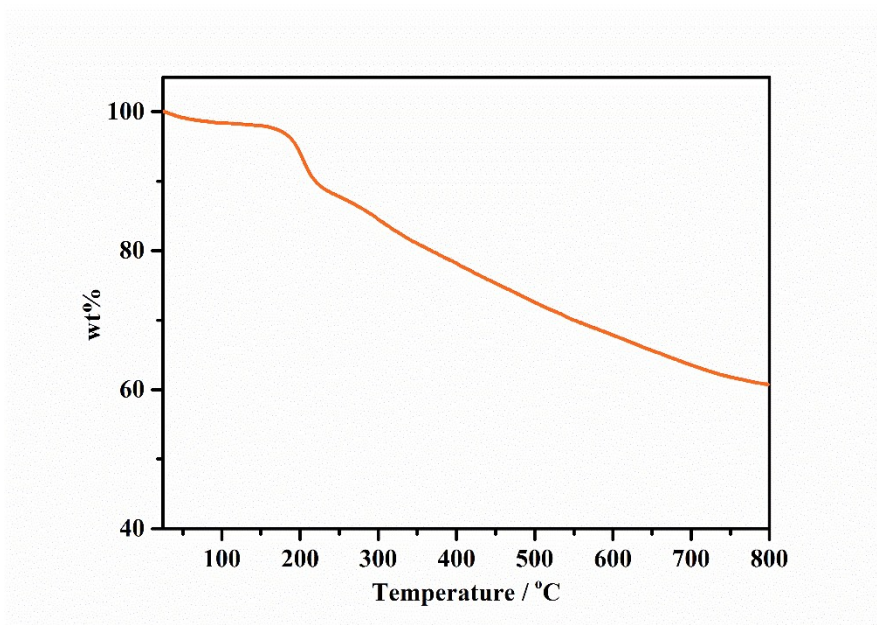

Fig. S3 TGA profile of Uni-DPP-PPN

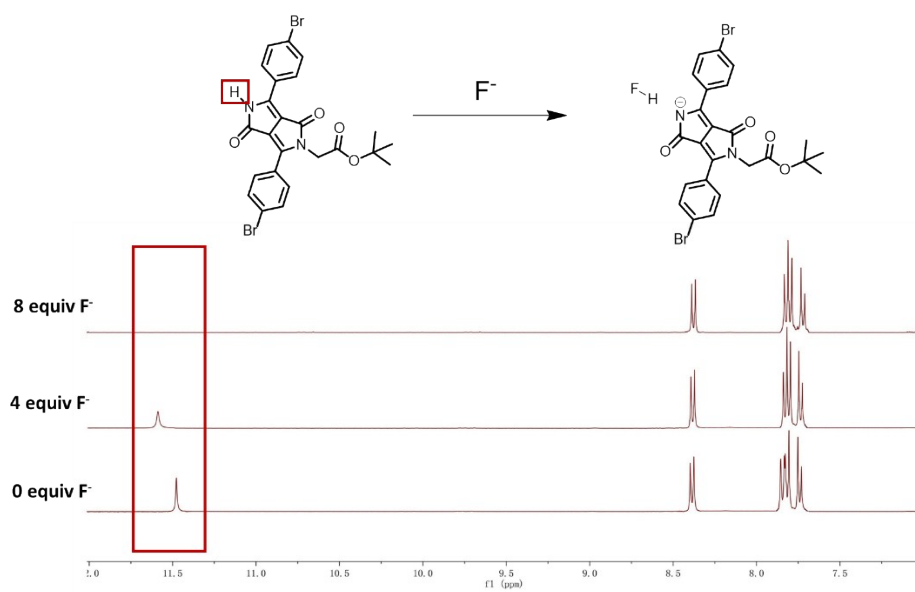

Fig. S4 <sup>1</sup>H NMR spectra of Uni-DPP in the presence of 0 equiv., 4 equiv. and 8 equiv. of F<sup>-</sup>

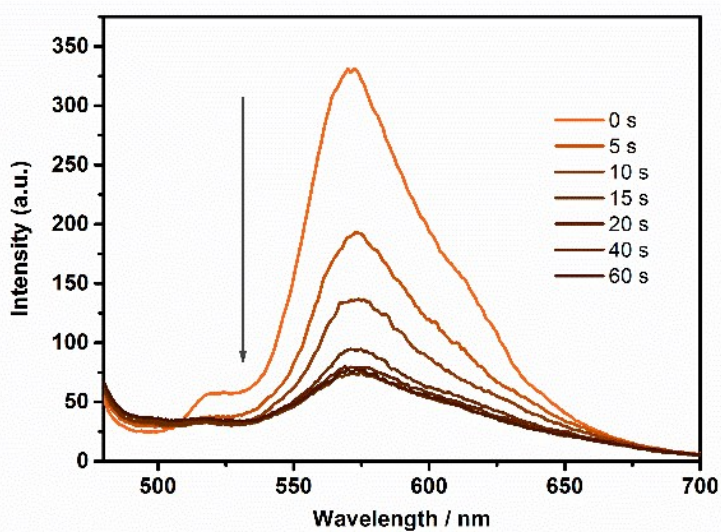

Fig. S5 Emission spectra of Uni-DPP-PPM upon incubation into F<sup>-</sup> solution (0.015 mM in THF) at various time intervals

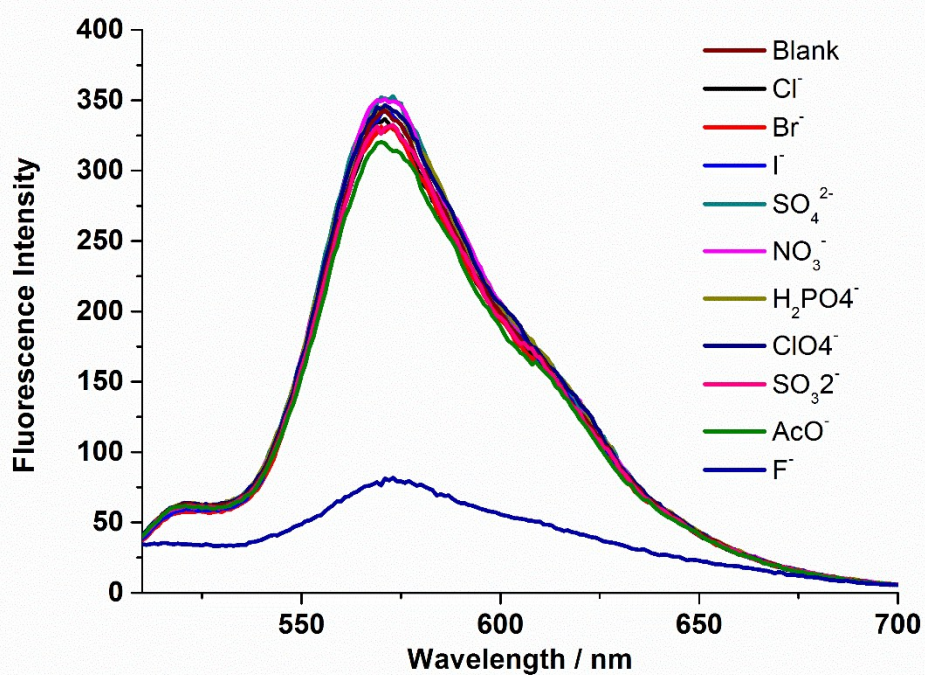

Fig. S6 Fluorescence spectra of Uni-DPP-PPN suspension in THF (0.1 mg/mL in THF) before (Blank) and after the addition of F<sup>-</sup> (0.015 mM) and other anions (1.5mM)



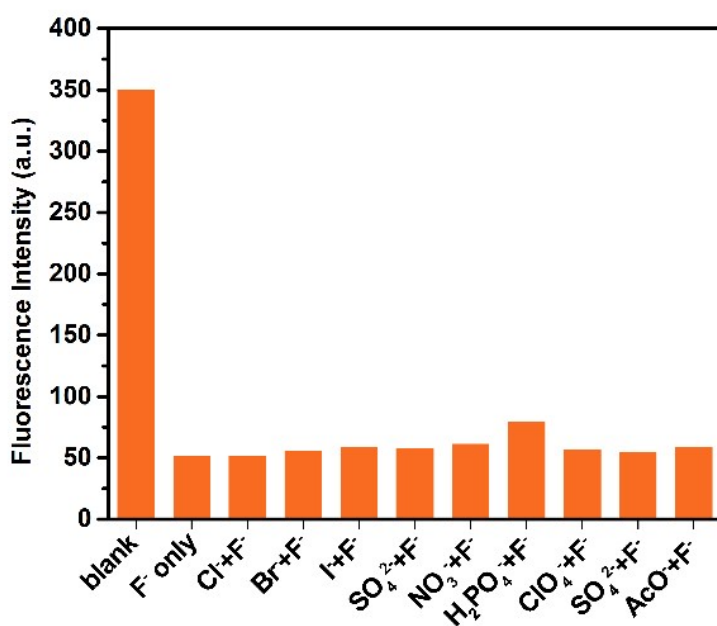

Fig. S7 The effect of co-existent ions to sensitivity of Uni-DPP-PPN to F<sup>-</sup> (0.015 mM for F<sup>-</sup> and 1.5mM for other anions)

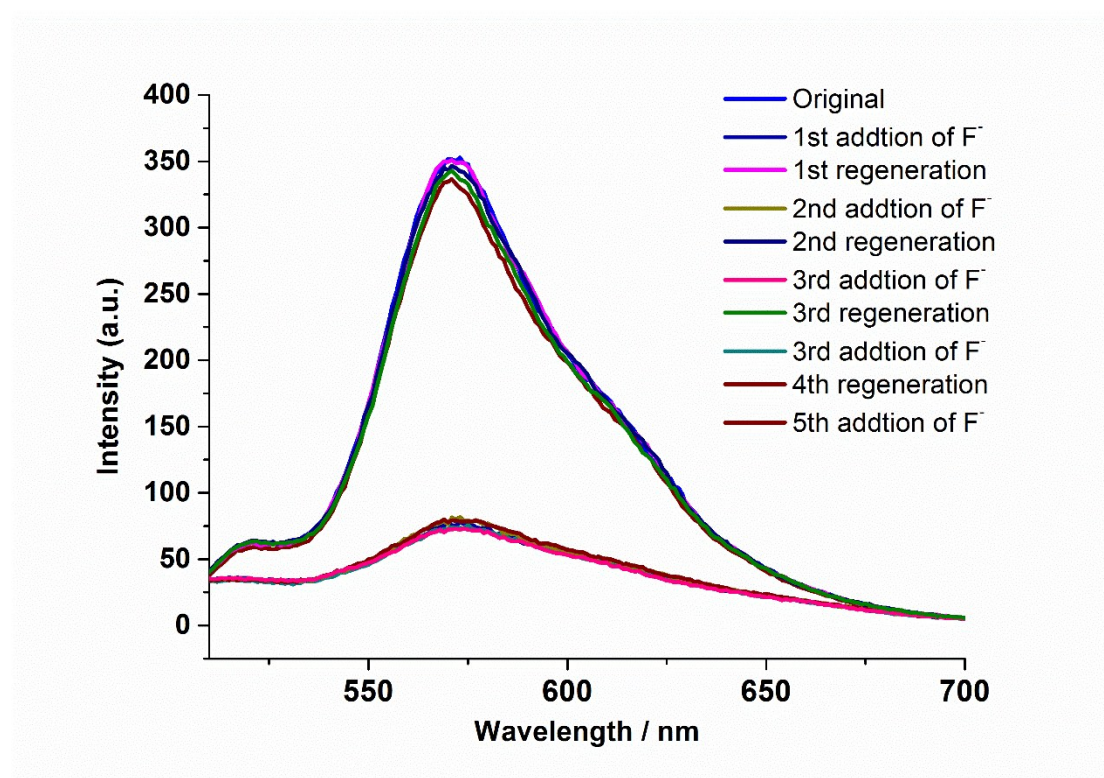

Fig. S8 Fluorescence spectra of Uni-DPP-PPN in each regeneration cycle

**Table S1 Electron density maps of HOMO and LUMO of Uni-DPP-PPN segment and its deprotonated counterpart**

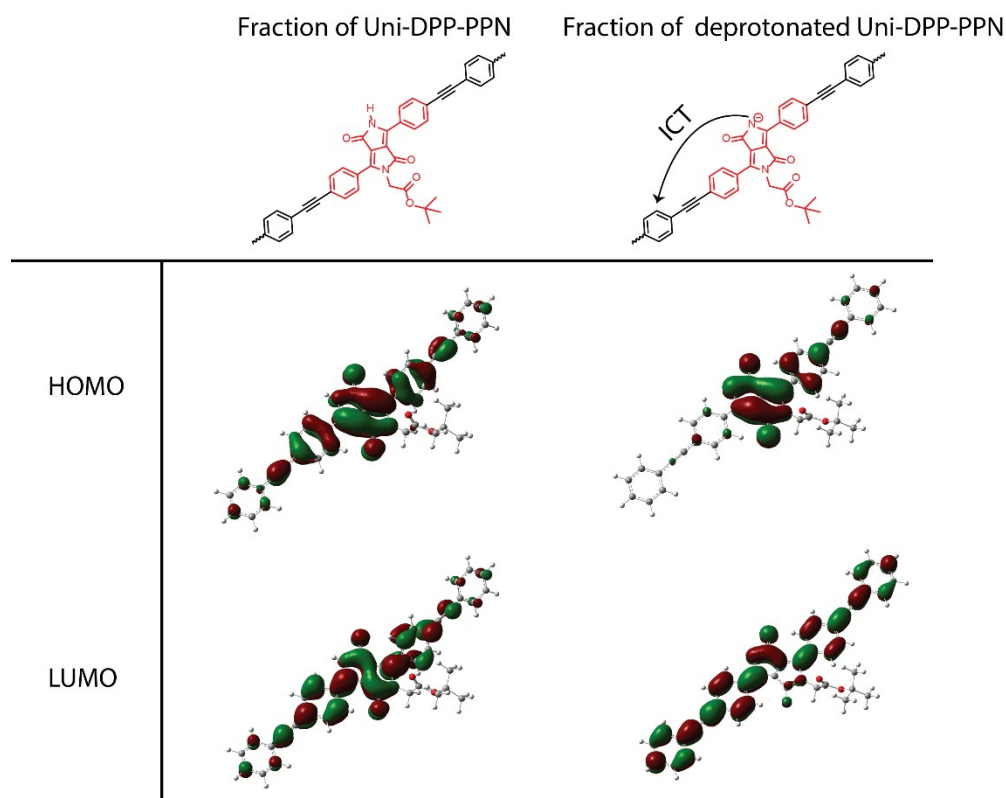

**Table S2 Comparison of Uni-DPP-PPN with other reported analogue as fluoride sensors**

| Sensor                                           | Stern-Volmer Constant             | Detection of Limits          | Reference |
|--------------------------------------------------|-----------------------------------|------------------------------|-----------|
| Uni-DPP-PPN                                      | $2.34 \times 10^5 \text{ M}^{-1}$ | 18 ppb (0.95 $\mu\text{M}$ ) | This work |
| PPS [N-((pyridin-4-yl)methylene)pyridin-4-amine] |                                   | 3 $\mu\text{M}$              | 4         |
| FS@UiO-66                                        |                                   | 4.4 $\mu\text{M}$            | 5         |
| pyrene-tagged UiO-66-NH <sub>2</sub>             |                                   | 0.82 $\mu\text{M}$           | 6         |
| Eu-MOF 1                                         |                                   | 2 $\mu\text{M}$              | 7         |
| Eu <sup>3+</sup> @MIL-121                        | $2.07 \times 10^3 \text{ M}^{-1}$ | 0.063 $\mu\text{M}$          | 8         |
| MOTIPS-TPE                                       |                                   | 90 nM                        | 9         |
| Eu(NTA-S15) <sub>3</sub> L                       |                                   | 180 $\mu\text{M}$            | 10        |
| Borane-aza-BODIPY                                |                                   | 0.1 ppm                      | 11        |
| 4-bromo-2,6-bis-(hydroxymethyl)phenol            |                                   | 1.5 $\mu\text{M}$            | 12        |
| Boron-based microporous organic                  |                                   | 2.6 $\mu\text{M}$            | 13        |

|         |  |  |  |
|---------|--|--|--|
| polymer |  |  |  |
|---------|--|--|--|

## Reference

- (1) M.J. Frisch, G. W. T., H.B. Schlegel, G.E. Scuseria, M.A. Robb, J.R. Cheeseman, G. Scalmani, V. Barone, B. Mennucci, G.A. Petersson, H. Nakatsuji, M. Caricato, X. Li, H.P. Hratchian, A.F. Izmaylov, J. Bloino, G. Zheng, J.L. Sonnenberg, M. Hada, M. Ehara, K. Toyota, R. Fukuda, J. Hasegawa, M. Ishida, T. Nakajima, Y. Honda, O. Kitao, H. Nakai, T. Vreven, J.A. Montgomery, Jr., J.E. Peralta, F. Ogliaro, M. Bearpark, J.J. Heyd, E. Brothers, K.N. Kudin, V.N. Staroverov, R. Kobayashi, J. Normand, K. Raghavachari, A. Rendell, J.C. Burant, S.S. Iyengar, J. Tomasi, M. Cossi, N. Rega, J.M. Millam, M. Klene, J.E. Knox, J.B. Cross, V. Bakken, C. Adamo, J. Jaramillo, R. Gomperts, R.E. Stratmann, O. Yazyev, A.J. Austin, R. Cammi, C. Pomelli, J.W. Ochterski, R.L. Martin, K. Morokuma, V.G. Zakrzewski, G.A. Voth, P. Salvador, J.J. Dannenberg, S. Dapprich, A.D. Daniels, O. Farkas, J.B. Foresman, J.V. Ortiz, J. Cioslowski, D.J. Fox *Gaussian 09 Revision A.1* Gaussian Inc.: Wallingford, CT, 2009.
- (2) Lee, C.; Yang, W.; Parr, R. Development of the Colle–Salvetti correlation-energy formula into a functional of the electron density. *Phys. Rev. B* **1988**, *38*, 785–789.
- (3) Hehre, W. J.; Ditchfield, R.; Pople, J. A. Self—Consistent Molecular Orbital Methods. XII. Further Extensions of Gaussian—Type Basis Sets for Use in Molecular Orbital Studies of Organic Molecules. *The Journal of Chemical Physics* **1972**, *56*, 2257-2261.
- (4) Ghosh, P.; Banerjee, P. Small molecular probe as selective tritopic sensor of Al<sup>3+</sup>, F<sup>-</sup> and TNP: Fabrication of portable prototype for onsite detection of explosive TNP. *Anal. Chim. Acta* **2017**, *965*, 111-122.
- (5) Zhao, X.; Wang, Y.; Hao, X.; Liu, W. Fluorescent molecule incorporated metal-organic framework for fluoride sensing in aqueous solution. *Appl. Surf. Sci.* **2017**, *402*, 129-135.
- (6) Dalapati, R.; Biswas, S. Post-synthetic modification of a metal-organic framework with fluorescent-tag for dual naked-eye sensing in aqueous medium. *Sensors Actuators B: Chem.* **2017**, *239*, 759-767.
- (7) Yang, Z.-R.; Wang, M.-M.; Wang, X.-S.; Yin, X.-B. Boric-Acid-Functional Lanthanide Metal–Organic Frameworks for Selective Ratiometric Fluorescence Detection of Fluoride Ions. *Anal. Chem.* **2017**, *89*, 1930-1936.
- (8) Hao, J.-N.; Yan, B. Ln<sup>3+</sup> post-functionalized metal-organic frameworks for color tunable emission and highly sensitive sensing of toxic anions and small molecules. *New J. Chem.* **2016**, *40*, 4654-4661.
- (9) Jiang, G.; Liu, X.; Wu, Y.; Wang, J.; Dong, X.; Zhang, G.; Li, Y.; Fan, X. An AIE based tetraphenylethylene derivative for highly selective and light-up sensing of fluoride ions in aqueous solution and in living cells. *RSC Advances* **2016**, *6*, 59400-59404.
- (10) Li, Y.; Yu, X.; Yu, T. Eu<sup>3+</sup> based mesoporous hybrid material with tunable multicolor emission modulated by fluoride ion: application for selective sensing toward fluoride ion. *J. Mater. Chem. C* **2017**, *5*, 5411-5419.
- (11) Swamy P, C. A.; Priyanka, R. N.; Mukherjee, S.; Thilagar, P. Panchromatic Borane–aza-BODIPY Conjugate: Synthesis, Intriguing Optical Properties, and Selective Fluorescent Sensing of Fluoride Anions. *Eur. J. Inorg. Chem.* **2015**, *2015*, 2338-2344.
- (12) Tavallali, H.; Deilamy-Rad, G.; Tabandeh, M. A selective detection of fluoride ions in DMSO by fluorescent and colorimetry competition assays based on 4-bromo-2,6-bis-(hydroxymethyl)phenol. *Chin. Chem. Lett.* **2011**, *22*, 193-196.
- (13) Suresh, V. M.; Bandyopadhyay, A.; Roy, S.; Pati, S. K.; Maji, T. K. Highly Luminescent Microporous



Organic Polymer with Lewis Acidic Boron Sites on the Pore Surface: Ratiometric Sensing and Capture of F<sup>-</sup> Ions. *Chemistry – A European Journal* **2015**, *21*, 10799-10804.
